# Supplementary material for: Evolution and Global Transmission of a Multidrug-Resistant, Community-Associated Methicillin-Resistant Staphylococcus aureus Lineage from the Indian Subcontinent
Source: PubMed Central journal article supplement (PMC6879714; doi:10.1128/mbio.01105-19), 2019-11-26

# Epidemiology of ST772

- South Asia
- Outside South Asia
- Unknown

1st Ring: Family  
2nd Ring: Travel Nodes

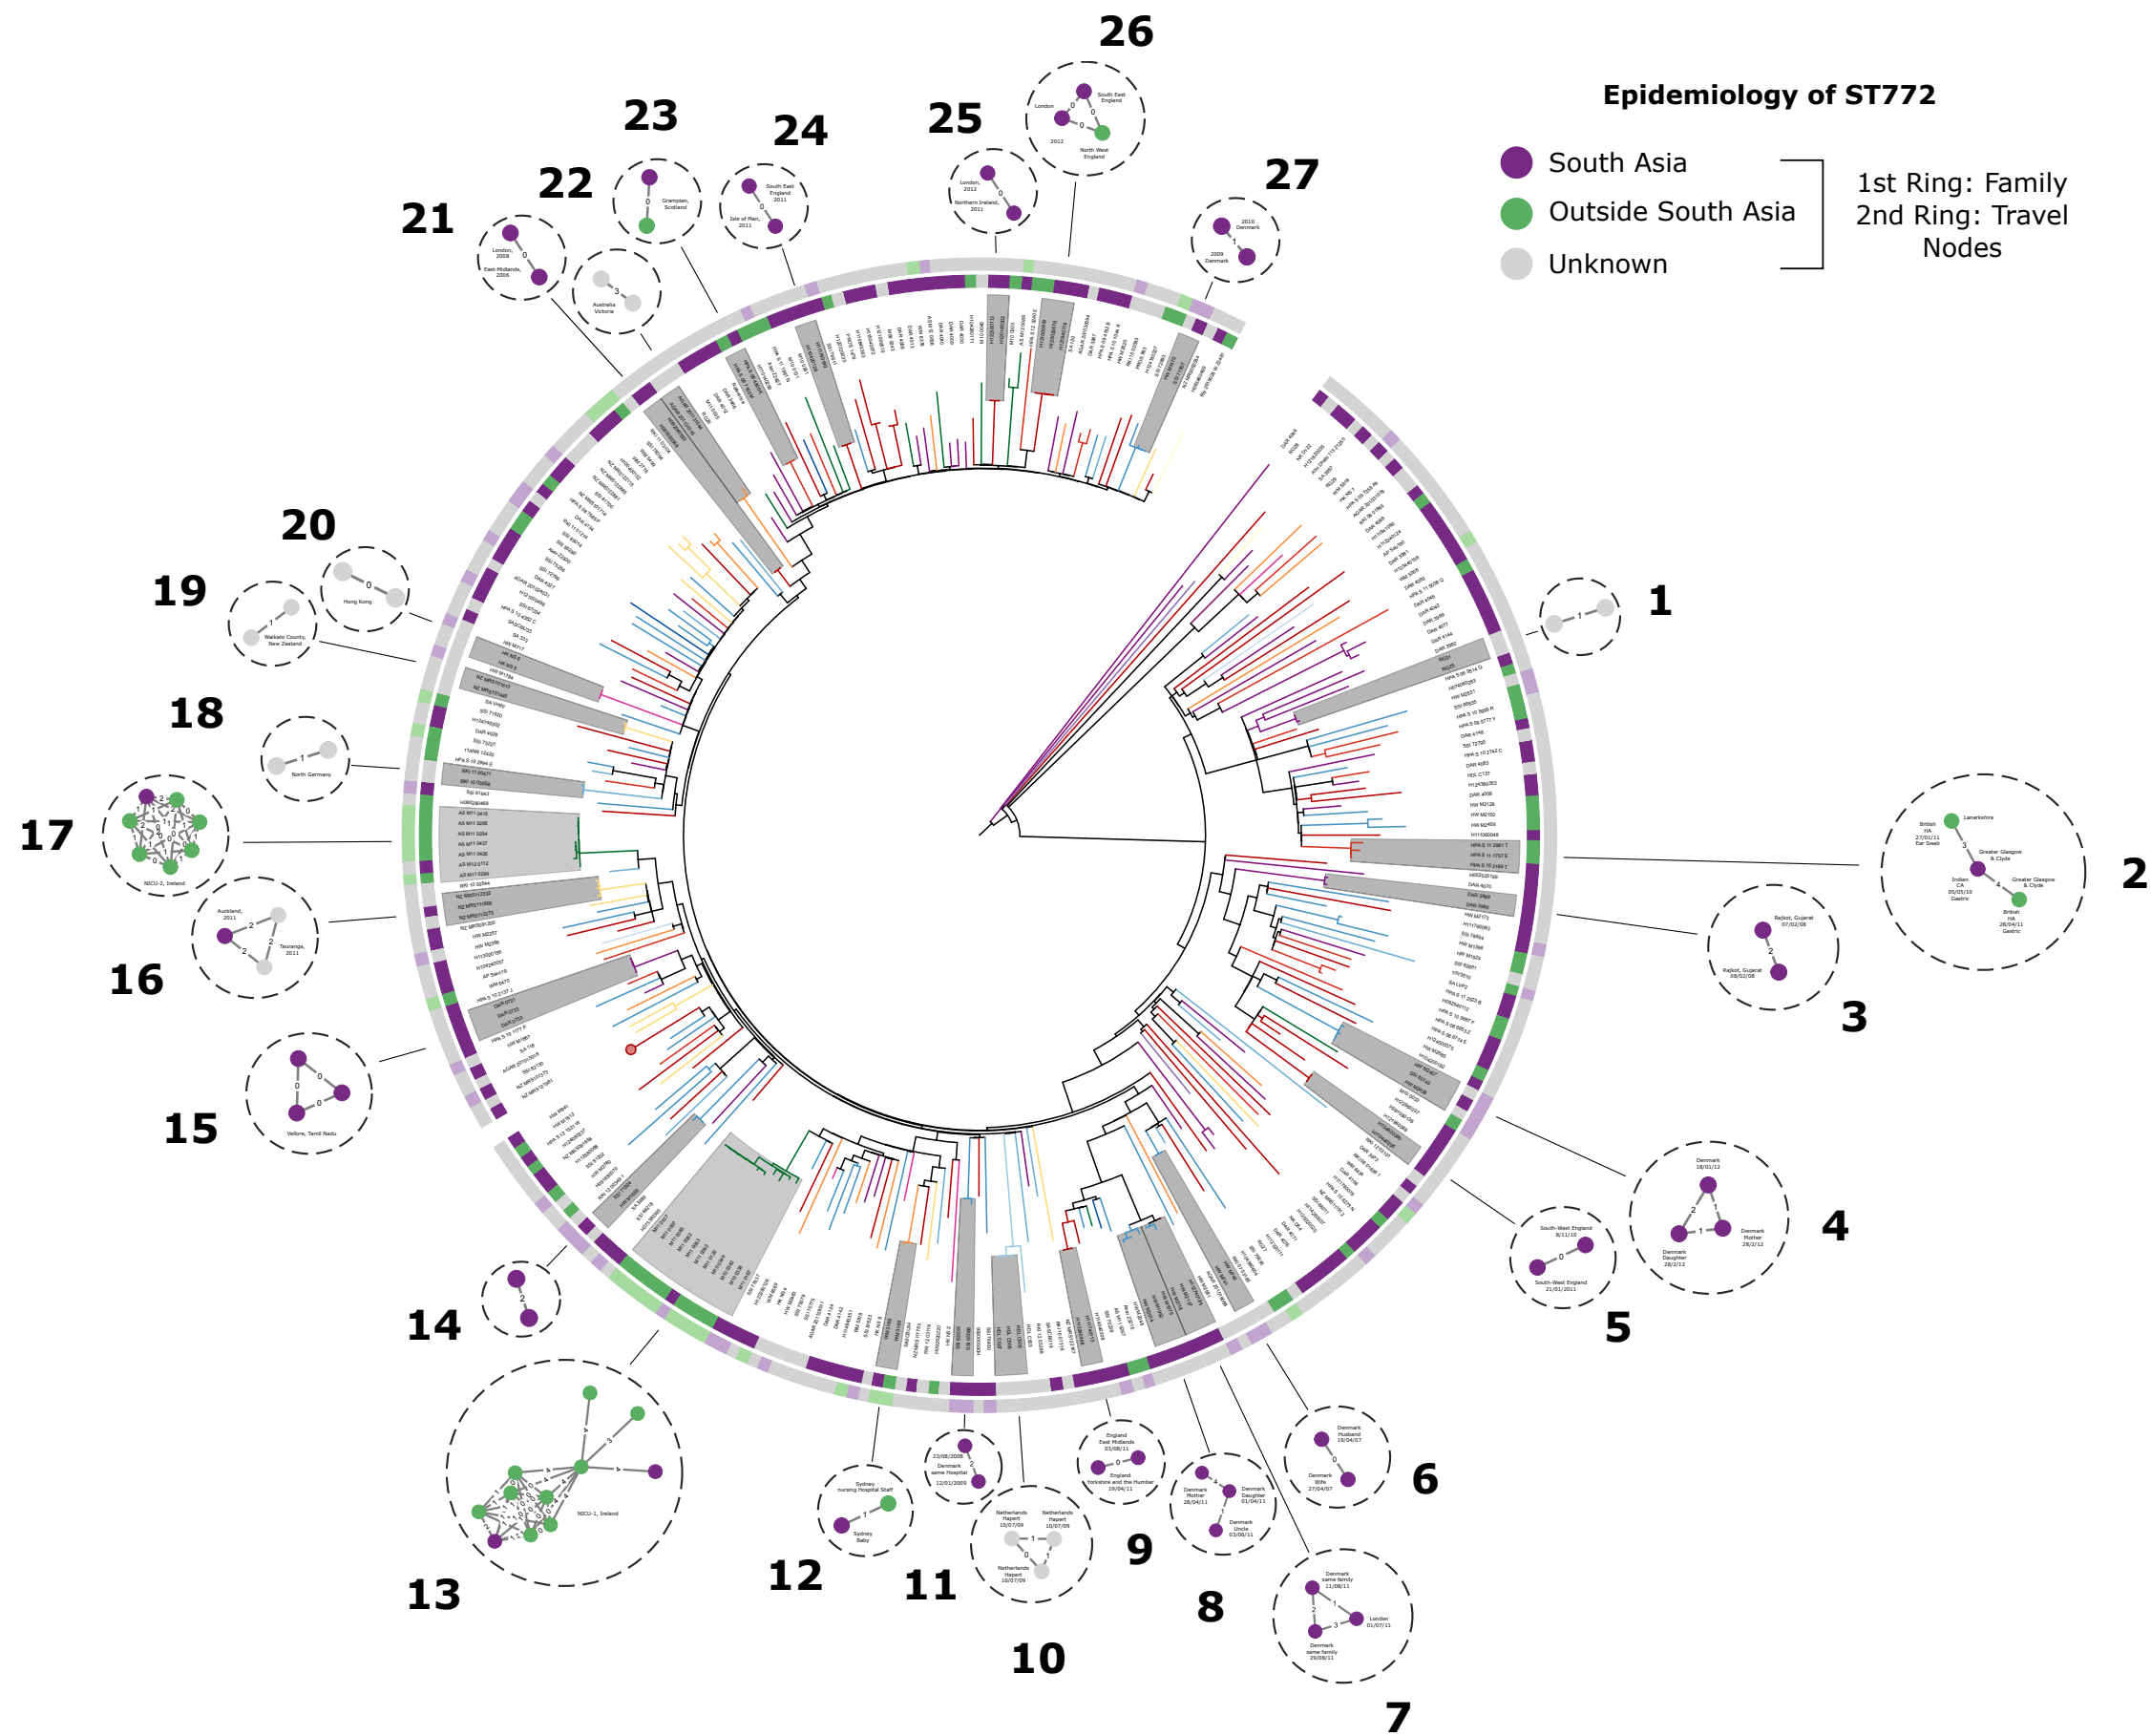

Supplement: mBio.01105-19-sf002.pdf [file mBio.01105-19-sf002.pdf]
