# Supplementary material for: Evolution and Global Transmission of a Multidrug-Resistant, Community-Associated Methicillin-Resistant Staphylococcus aureus Lineage from the Indian Subcontinent
Source: PubMed Central journal article supplement (PMC6879714; doi:10.1128/mbio.01105-19), 2019-11-26

**a**

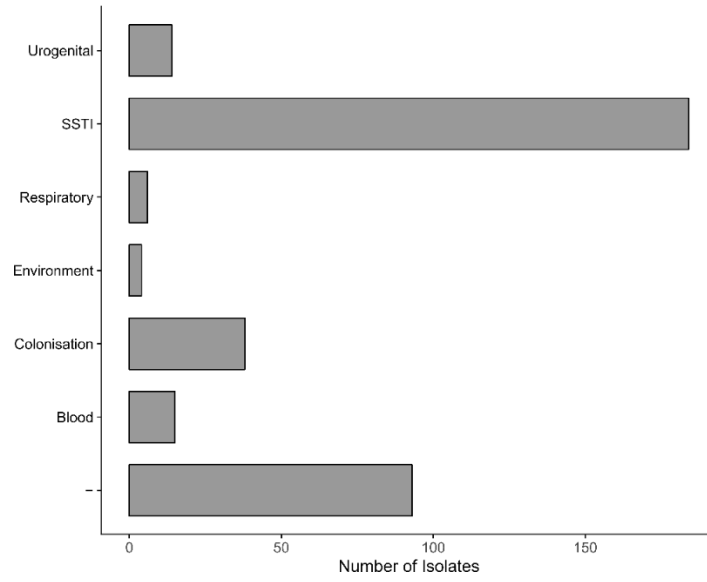

**b**

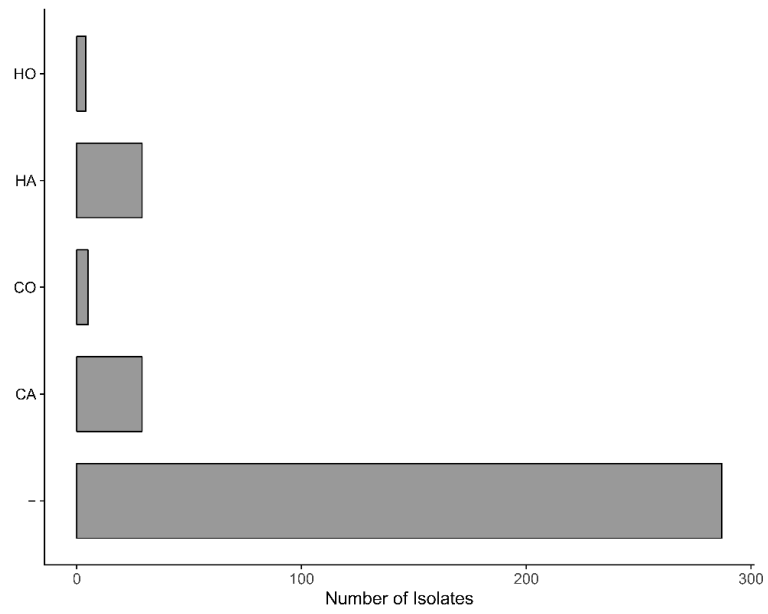

Supplement: mBio.01105-19-sf005.pdf [file mBio.01105-19-sf005.pdf]
